# Supplementary material for: A MXene–BiFeO3–ZnO nanocomposite photocatalyst served as a high-performance supercapacitor electrode
Source: Royal Society of Chemistry journal article supplement (doi:10.1039/d3cp02444j), 2023-01-01
Supplement: d3cp02444j1.pdf [file d3cp02444j1.pdf]

## Supplementary Information

### MXene-BiFeO<sub>3</sub>-ZnO nanocomposite photocatalyst served as a high-performance supercapacitor electrode

*Riya Nag<sup>a#</sup>, Sayan Das<sup>b,c#</sup>, Debu Das<sup>d</sup>, Adyam Venimadhav<sup>b</sup>, Abhijit Bera<sup>a\*</sup>*

<sup>a</sup>Department of Physics, Midnapore College (Autonomous), Raja Bazar Main Rd, 721101  
Midnapore, India

<sup>b</sup>Cryogenic Engineering Centre, Indian Institute of Technology Kharagpur, Kharagpur, West Bengal 721302, India.

<sup>c</sup>Davidson School of Chemical Engineering, Purdue University, West Lafayette, IN, 47907, USA.

<sup>d</sup>School of Materials Science, Indian Association for the Cultivation of Science, 2A & 2B Raja S.C Mullick Road, Kolkata 700032, W.B., India

<sup>#</sup>RN and SD contribute equally.

\*Electronic Address: Email: [abhijit.bera@midnaporecollege.ac.in](mailto:abhijit.bera@midnaporecollege.ac.in)

### **Contents**

#### **Section 1. FESEM and elemental analysis of MXBZ**

A. FESEM image of MXene, BFO-ZnO, and MXBZ nanocomposite S2

B. FESEM elemental mapping and image of MXBZ nanocomposite S3

**Section 2:** XPS analysis of MXBZ nanocomposite S4

**Section 3:** FESEM image of MXBZ nanocomposite film after 1000<sup>th</sup> cycle use S5

Section 4: Comparison Table of supercapacitor application S6

## A. FESEM study

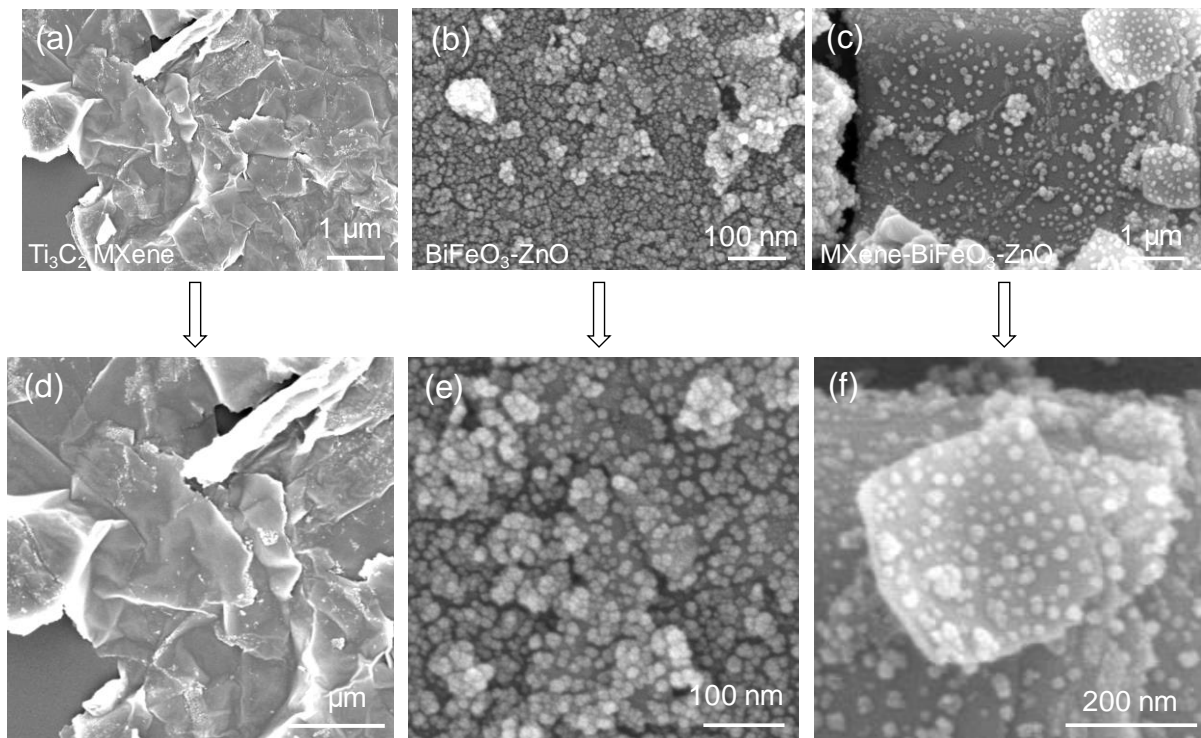

**Fig. S1.** FESEM image of MXBZ: (a-c) Large scale and (d-f) corresponding zoom-in region of pristine MXene nanosheets (a,d),  $\text{BiFeO}_3\text{-ZnO}$  (b,e), and MXene- $\text{BiFeO}_3\text{-ZnO}$  nanocomposite (c,f).

## B. FESEM elemental mapping of MXBZ

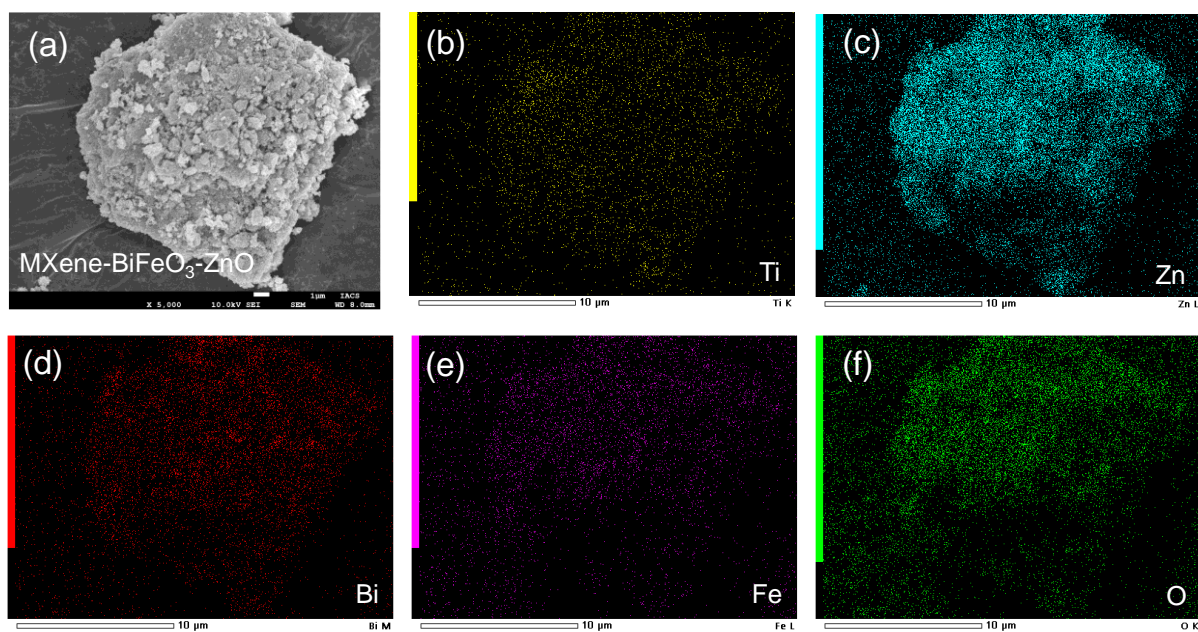

**Fig. S2.** Elemental mapping of MXBZ nanocomposite: (a) FESEM image and (b-f) corresponding elemental mapping. The colour codes for different elements are represented in the inset.

## 2. XPS analysis of MXBZ film:

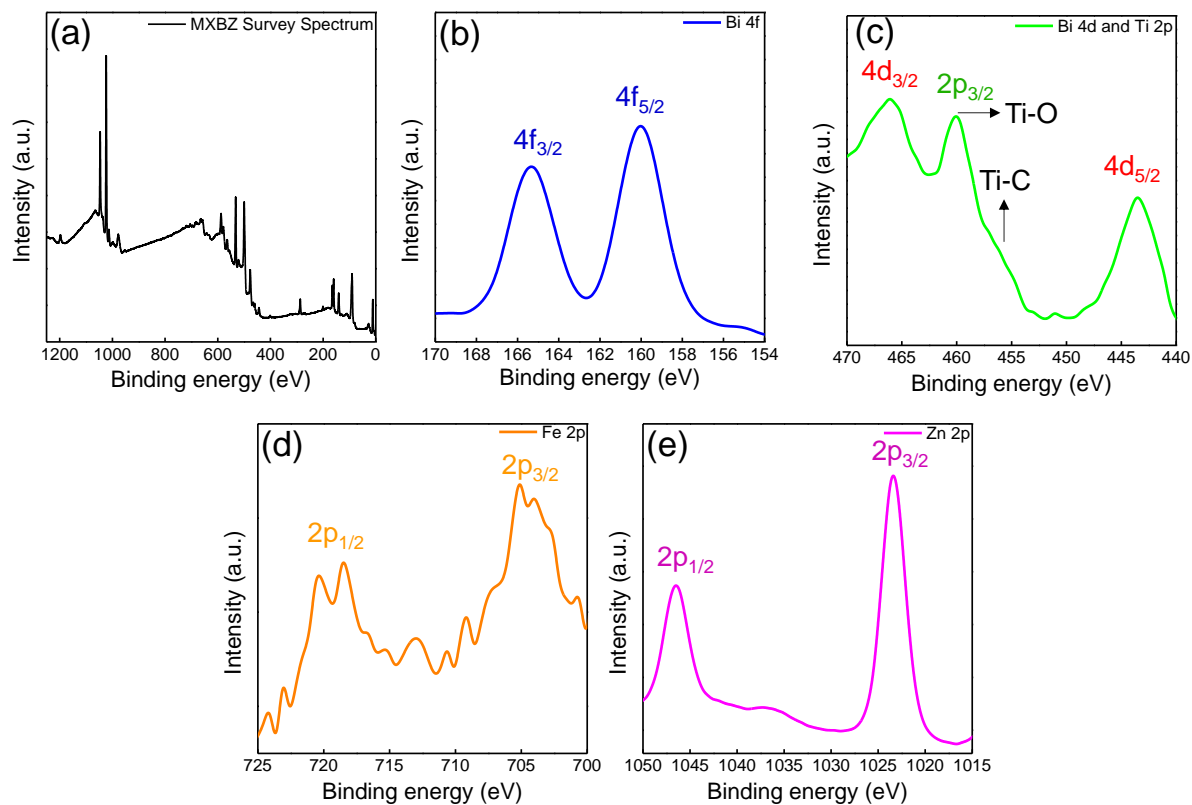

**Fig. S3:** XPS analysis of MXBZ nanocomposite: (a) Survey spectrum. (b-e) Core level spectra of individual elements. The oxidation states of different elements are assigned in the peaks.

### 3. Device performance after usage

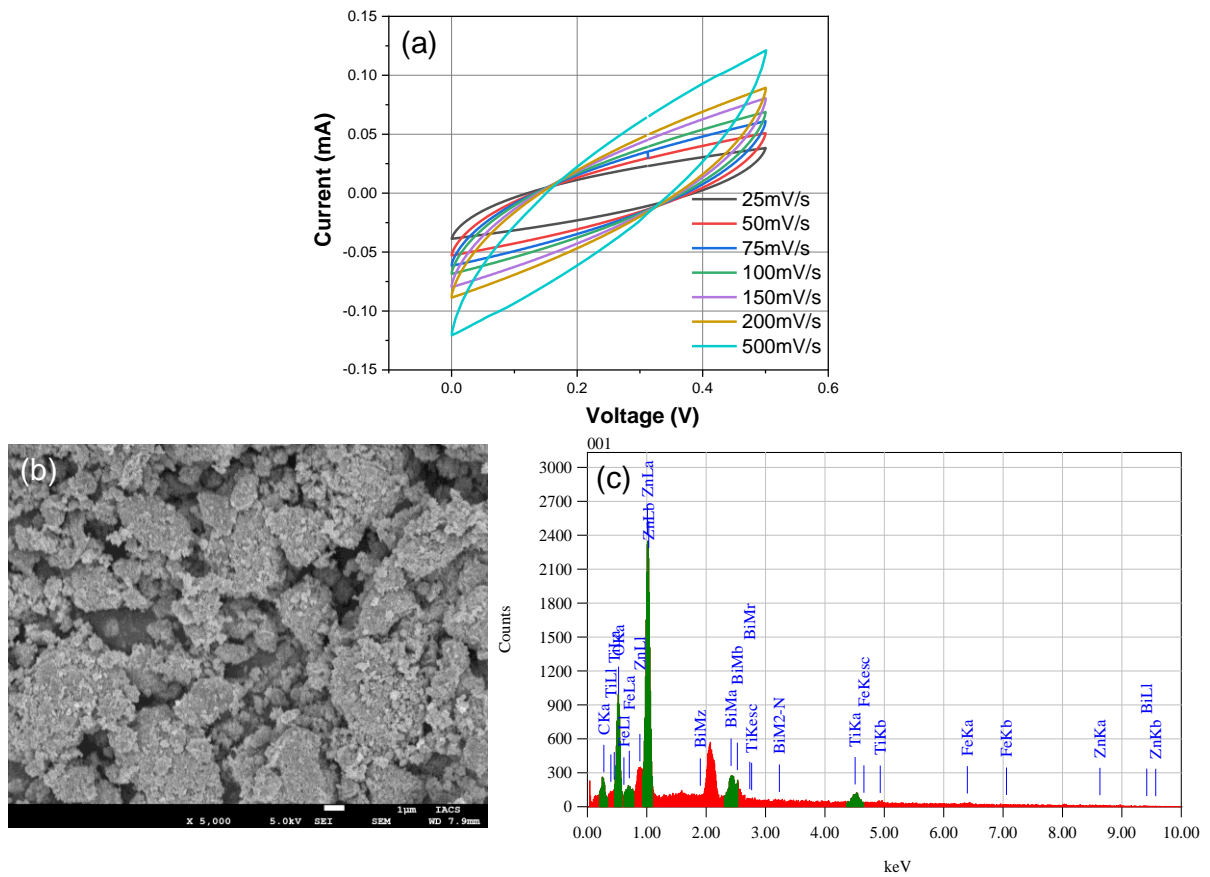

**Fig. S4.** Electrolyte performance after usage: (a) CV data after the 8000<sup>th</sup> charging-discharging cycle. (b) FESEM image and corresponding (c) EDS analysis of MXBZ nanocomposite film after 8000<sup>th</sup> charging-discharging cycles.

#### 4. Comparison of the electrochemical performance:

**Table S1:** Comparison table of supercapacitor electrode

| Electrode                                           | Electrolyte                           | Specific capacitance                                  | Energy density                 | Cyclic stability | Reference        |
|-----------------------------------------------------|---------------------------------------|-------------------------------------------------------|--------------------------------|------------------|------------------|
| BiFeO <sub>3</sub>                                  | 1 M NaOH                              | 81 F/g at 1 mA                                        | 6.6832 J g <sup>-1</sup>       | 1000             | 1                |
| ZnO (Photo supercapacitor)                          | -                                     | 1.65 mF/g                                             | 78.1 mWh kg <sup>-1</sup>      | 3000             | 2                |
| NiO/ZnO                                             | 1M Na <sub>2</sub> SO <sub>4</sub>    | 469 F/g at 1 mA/g                                     | 91.14 Wh/kg <sup>-1</sup>      | 5000             | 3                |
| 3D graphene-ZnO nanorod                             | -                                     | 554.23 F/g at 5 mV/s                                  | -                              | 2300             | 4                |
| BiFeO <sub>3</sub> -TiO <sub>2</sub>                | 0.5 M Na <sub>2</sub> SO <sub>4</sub> | 440 F/g at 1.1 A/g 350 F/g at 2.5 A/g                 | 46.5 Wh/kg <sup>-1</sup>       | 1200             | 5                |
| BiFeO <sub>3</sub> -Graphene                        | 1 M Na <sub>2</sub> SO <sub>4</sub>   | 17-4 mF/cm <sup>2</sup> at 5-100 mV/s                 | -                              | 2000             | 6                |
| BFO/graphene                                        | 1 M Na <sub>2</sub> SO <sub>4</sub>   | 9 mF/ cm <sup>2</sup> at 0-0.9 V                      | 0.2-0.6 Wh/kg.                 | 1000             | 7                |
| BiFeO <sub>3</sub> /Cr <sub>2</sub> CT <sub>x</sub> | 1 M KOH                               | 671.2 C g <sup>-1</sup> At 1 A g <sup>-1</sup>        | -                              | 3000             | 8                |
| CoFe <sub>2</sub> O <sub>4</sub> /MXene             | 1 M KOH                               | 1268.75 F/g at 1 A/g                                  | -                              | 5000             | 9                |
| WO <sub>3</sub> -MXene                              | 0.5 M H <sub>2</sub> SO <sub>4</sub>  | 297 F/g at 1 A/g                                      | -                              | 5000             | 10               |
| NiFe-LDH/MXene                                      | 1 M KOH                               | 720.2 F/g at 1 A/g                                    | 42.4 Wh kg <sup>-1</sup>       | 1000             | 11               |
| NiCoFe-LDH/Ti <sub>3</sub> C <sub>2</sub>           | 1 M KOH                               | 1990 F/g at 1 A/g                                     | 54.4 Wh kg <sup>-1</sup>       | 5000             | 12               |
| Ti <sub>3</sub> C <sub>2</sub> T <sub>x</sub> /RGO  | PVA-H <sub>2</sub> SO <sub>4</sub>    | 18.6 mF/cm <sup>2</sup> at 1 A/g                      | -                              | 10000            | 13               |
| <b>MXBZ</b>                                         | <b>Sodium Sulfate + NaCMC polymer</b> | <b>142.8 mF/cm<sup>2</sup> at 7 μA/cm<sup>2</sup></b> | <b>1.65 μWh/cm<sup>2</sup></b> | <b>8000</b>      | <b>This work</b> |

## Reference:

- [1] C.D. Lokhande, T.P. Gujar, V. R. Shinde, Rajaram S. Mane, Sung-Hwan Han, *Electrochem. Commun.*, 2007, **9**,1805-1809.
- [2] C. T. Altaf, O. Coskun, A. Kumtepe, A. M. Roatas, I. Iatsunskiy, E. Coy, E. Erdem, M. Sankir, N. D. Sankir, *Sci. Rep.*, 2022, **12**, 11487.
- [3] P. Anandhi, V. Jawahar Senthil Kumar, S. Harikrishnan, *Funct. Mater. Lett.*, 2019, **12**, 1950064.
- [4] X. Li, Z. Wang, Y. Qiu, Q. Pan, P. Hu, *J. Alloys Compd.*, 2015, **620**, 31-37
- [5] A. Sarkar, A. K. Singh, D. Sarkar, G. G. Khan, K. Mandal, *ACS Sustain. Chem. Eng.*, 2015, **3**, 2254–2263.
- [6] S. Nayak, A. Soam, J. Nanda, C. Mahender, M. Singh, D. Mohapatra, R. Kumar, *J. Mater. Sci. Mater. Electron.*, 2018, **29**, 9361-9368.
- [7] A. Soam, R. Kumar, Mahender C, M. Singh, D. Thatoi, R. O. Dusane, *J. Alloys Compd.*, 2020, **813**, 152145.
- [8] S. Reghunath, Sunaja Devi K R, S. Rajasekaran, B. Saravanakumar, J. J. William, D. Pinheiro, *Electrochim. Acta.*, 2023, **46**, 142685.
- [9] I. Ayman, A. Rasheed, S. Ajmal, A. Rehman, A. Ali, I. Shakir, M. F. Warsi, *Energy Fuels*, 2020, **34**, 7622–7630.
- [10] C. Peng, Z. Kuai, T. Zeng, Y. Yu, Z. Li, J. Zuo, S. Chen, S. Pan, L. Li, *J. Alloys Compd.*, 2019, **810**, 151928.
- [11] H. Zhou, F. Wu, L. Fang, J. Hu, H. Luo, T. Guan, B. Hu, M. Zhou, *Int. J. Hydrog. Energy*, 2020, **45**, 13080-13089.
- [12] J. Chen, Y. Ren, H. Zhang, J. Qi, Y. Sui, F. Wei, *Appl. Surf. Sci.*, 2021, **562**, 150116.
- [13] Y. Zhou, K. Maleski, B. Anasori, J. O. Thostenson, Y. Pang, Y. Feng, K. Zeng, C. B. Parker, S. Zauscher, Y. Gogotsi, J. T. Glass, C. Cao, *ACS Nano*, 2020, **14**, 3576–3586.
